# Supplementary material
Source: publisher site journal article supplement (https://www.dovepress.com/article/248080)
Supplement: Supplementary file 1 [file get_supplementary_file.php]

## **Appendix:**

### **Preoperative Cataract Surgery Appointment Survey**

#### Demographics and Background:

1. What is your age? \_\_\_\_\_

2. What is your gender? \_\_\_\_\_

3. Is English your first language (Circle one)?    Yes    No

4. What is the highest level of education you have completed (Check one)?

\_\_\_\_None

\_\_\_\_Grade School

\_\_\_\_High School

\_\_\_\_Some College

\_\_\_\_Bachelor's Degree

\_\_\_\_Some Graduate School

\_\_\_\_Graduate Degree

5. What information about cataracts did you review prior to today (Check all that apply)?

\_\_\_\_None

Other\_\_\_\_\_

\_\_\_\_Video or TV Resources

\_\_\_\_Online Resources

\_\_\_\_Written Resources

\_\_\_\_Discussed with an Eye Doctor

\_\_\_\_Discussed with a Non-Eye

Doctor

\_\_\_\_Discussed with Friends/Family

## **Cataract Surgery Knowledge**

1. What is a “cataract”?
  - A. Calcification within the retina
  - B. Newly grown layer on the eye
  - C. Opacity of the lens
  - D. Elevation of eye pressure
2. How does one notice that one has “cataract”?
  - A. Dizziness when reading
  - B. Decreased sight, fogginess, pale colors
  - C. Dark spots within field of vision
  - D. Seeing flashes of light
3. How can cataracts be treated?
  - A. New glasses
  - B. Special eye training
  - C. Vitamin tablets
  - D. Surgery
4. How does the surgeon reach the cataract inside the eye?
  - A. Via a self-sealing cut in the cornea
  - B. The eyeball is taken out of the eye socket.

C. The eye does not have to be cut and opened.

D. The entire cornea is cut and flipped side-ways, similar to cutting off the heel of a loaf of bread.

5. How is the cataract removed?

A. With ultrasound

B. Freezing it off

C. Burning it off

D. With a laser

E. A and D

6. Where is the new artificial lens placed inside the eye?

A. On top of the cornea

B. It is sutured on the iris

C. In the place of the “old” lens

D. In front of the retina

|                                                                     |     |    |
|---------------------------------------------------------------------|-----|----|
| 7. Can complications from cataract surgery cause negative outcomes? | Yes | No |
|---------------------------------------------------------------------|-----|----|

|                                                                             |     |    |
|-----------------------------------------------------------------------------|-----|----|
| 8. Will an intraocular lens be needed to improve your vision after surgery? | Yes | No |
|-----------------------------------------------------------------------------|-----|----|

|                                                                                                    |     |    |
|----------------------------------------------------------------------------------------------------|-----|----|
| 9. Is it true that you should consider cataract surgery only when you lose your vision completely? | Yes | No |
|----------------------------------------------------------------------------------------------------|-----|----|

10. Is it likely your vision will be completely clear the first day after surgery?                      Yes      No

11. Is it likely your vision will slowly improve over a few days following surgery?                      Yes      No

**Quality of Care:**

*Please check the ONE box that corresponds with your answer for each statement*

|                                                                            | Strongly Agree | Agree | Disagree | Strongly<br>Disagree |
|----------------------------------------------------------------------------|----------------|-------|----------|----------------------|
| 1. My provider explained information in a way that was easy to understand. |                |       |          |                      |
| 2. My provider spent enough time with me.                                  |                |       |          |                      |

3. On a scale from 1 to 5, how would you rate the quality of your care today (5 being best)?

1      2      3      4      5      (circle one)

4. On a scale from 1 to 5, how comfortable do you feel in your understanding of your upcoming surgery?

1      2      3      4      5      (circle one)

**Lens Choice:**

- |                                                          |     |    |           |
|----------------------------------------------------------|-----|----|-----------|
| 1. Will you be receiving a multifocal lens?              | Yes | No | Undecided |
| 2. Will you be receiving a lens that treats astigmatism? | Yes | No | Undecided |
| 3. Will you be receiving laser-assisted surgery?         | Yes | No | Undecided |

**Provider Survey Questions:**

1. On a scale from 1 to 5 (with 5 being the highest), how would you describe your perception of the patient's knowledge about cataract surgery?

1      2      3      4      5      (circle one)

2. On a scale from 1 to 5 (with 5 being the highest), how would you describe your personal satisfaction with your interaction with this patient today?

1      2      3      4      5      (circle one)

3. How much face-to-face time did you spend with this patient today (mins)? \_\_\_\_\_

**Note:** Adapted with permission from Wolters Kluwer Health, Inc. Tipotsch-Maca SM, Varsits RM, Ginzel C, Vecsei-Marlovits PV. Effect of a multimedia-assisted informed consent procedure on the information gain, satisfaction, and anxiety of cataract surgery patients. *J Cataract Refract Surg*. 2016;42(1):110–116.<sup>1</sup>

## Reference

1. Tipotsch-Maca SM, Varsits RM, Ginzel C, Vecsei-Marlovits PV. Effect of a multimedia-assisted informed consent procedure on the information gain, satisfaction, and anxiety of cataract surgery patients. *J Cataract Refract Surg*. 2016;42(1):110–116.  
doi:10.1016/j.jcrs.2015.08.019
